# Supplementary material for: A novel quinoline derivative as a highly selective and sensitive fluorescent sensor for Fe3+ detection
Source: Royal Society of Chemistry journal article supplement (doi:10.1039/d2ra03654a), 2022-01-01
Supplement: d2ra03654a1.pdf [file d2ra03654a1.pdf]

## Electronic Supplementary Information

### A Novel Quinoline Derivatives as a Highly Selective and Sensitive Fluorescent sensor for Fe<sup>3+</sup> detection

LUO Mingxin,<sup>a</sup> SUN Bo,<sup>b</sup> ZHOU Chen,<sup>a</sup> PAN Qingqing,<sup>a</sup> HOU Yue,<sup>c</sup> ZHANG Huan,<sup>a</sup> SUN Jing,<sup>a</sup> ZOU Chenyang,<sup>a</sup>

<sup>a</sup> School of Chemistry & Environmental Engineering, Jilin Provincial International Joint Research Center of Photo-functional Materials and Chemistry, Changchun University of Science and Technology, Changchun, 130022, PR China

<sup>b</sup> Petrochina Jilin Petrochemical Company Refinery, Jilin, 132000, PR China

<sup>c</sup> School of Life Science and Technology, Changchun University of Science and Technology, Changchun, 130022, PR China )

**Fig.S1** <sup>1</sup>H NMR spectrum of sensor 1

**Fig.S2** <sup>13</sup>C NMR spectrum of sensor 1

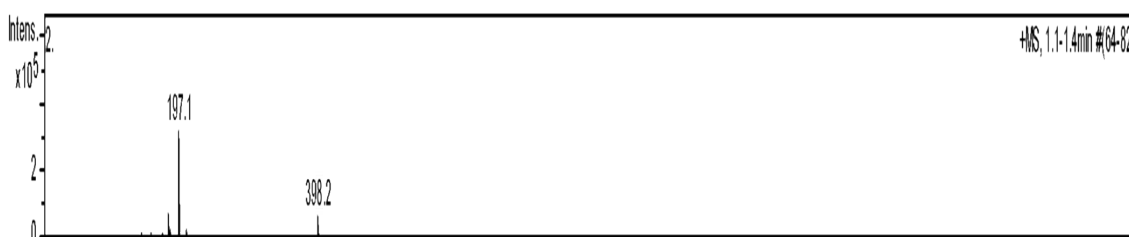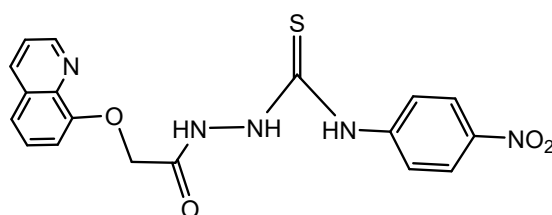

Chemical Formula: C<sub>18</sub>H<sub>15</sub>N<sub>5</sub>O<sub>4</sub>S

Exact Mass: 397.08

Molecular Weight: 397.41

m/z: 397.08 (100.0%), 398.09 (19.8%), 399.08 (4.9%), 399.09 (2.8%), 398.08 (2.6%)

Elemental Analysis: C, 54.40; H, 3.80; N, 17.62; O, 16.10; S, 8.07

**Fig.S3** HRMS spectrum of sensor 1
